# Supplementary material
Source: PubMed Central journal article supplement (PMC4502613)

**a** gastrointestinal  
diarrhea

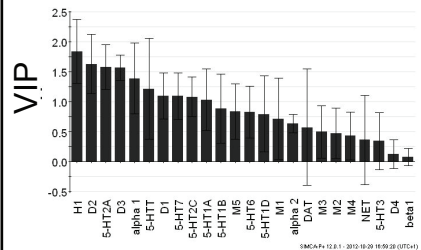

nausea

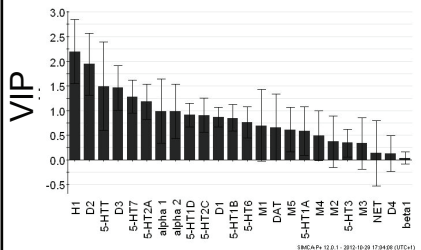

**b** cardiovascular  
hypotension

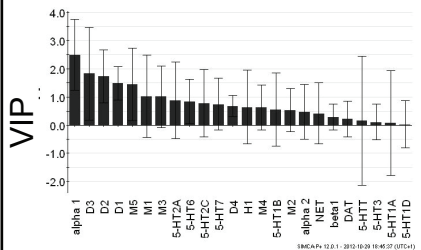

**c** neuropsychiatric  
dizziness

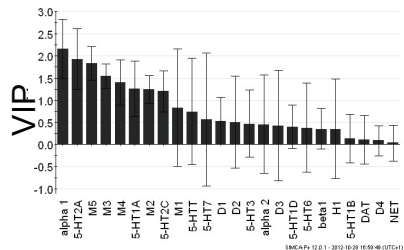

insomnia

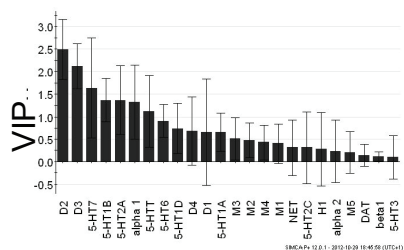

sleepiness

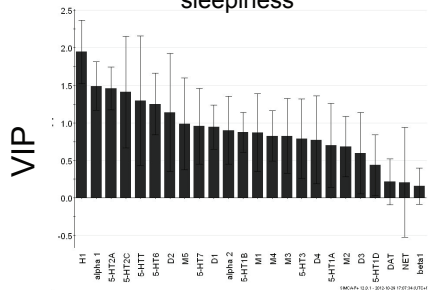

headache

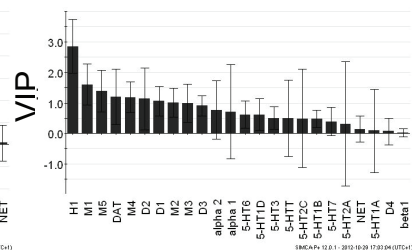

sedation

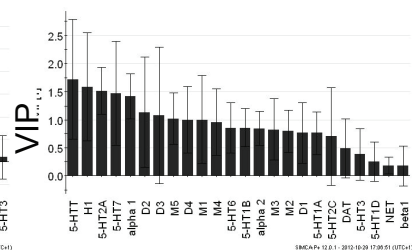

**d** dermatological  
increased sweating

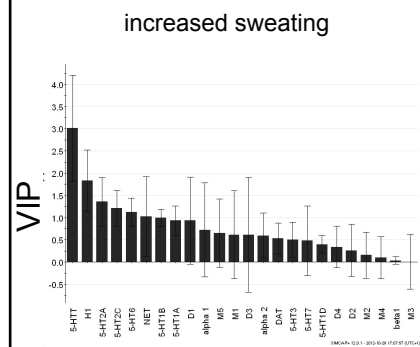

**e** other  
weight gain

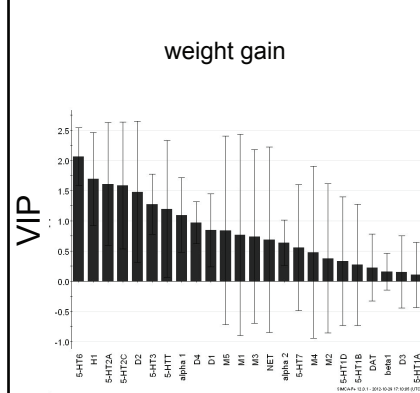

Supplement: NIHMS63251-supplement-SuppFigS2.pdf [file NIHMS63251-supplement-SuppFigS2.pdf]
