# Supplementary material
Source: PubMed Central journal article supplement (PMC4502613)

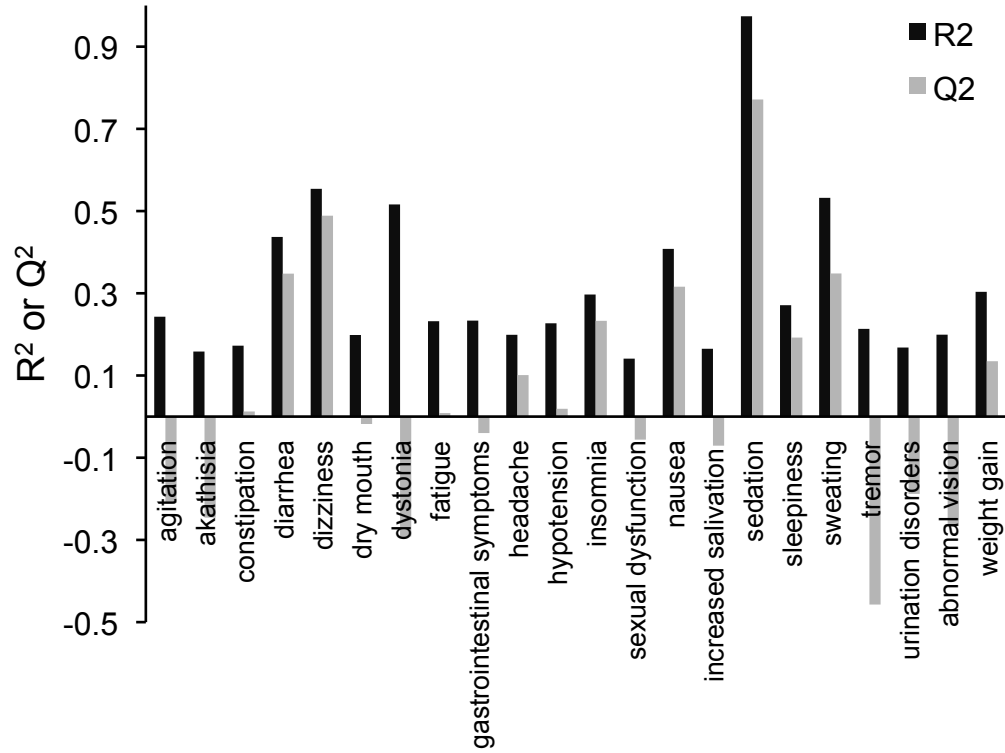

Supplement: NIHMS63251-supplement-SuppFigS1.pdf [file NIHMS63251-supplement-SuppFigS1.pdf]
